# Supplementary material for: A Climate of Emotions pilot study reducing climate anxiety and strengthening resilience
Source: Research Square preprint supplement (doi:10.21203/rs.3.rs-8349463/v1), 2026-01-23
Supplement: Supplementary file 1 [file 23c94b4b41b0d74c6a035ba5.docx]

# **Supplementary File 3: Generative AI Prompts and Outputs Used in Manuscript Preparation**

Purpose of this Supplementary File This file documents the use of generative artificial intelligence (ChatGPT-4o by OpenAI) in the preparation of this manuscript, in compliance with Frontiers’ editorial policy. It includes the prompts submitted to the AI tool and the corresponding outputs that informed various sections of the paper. All AI-generated content was reviewed, edited, and verified by the authors for accuracy, originality, and relevance. No generative AI tool is listed as an author, and the authors accept full responsibility for the content of the manuscript.

###

### **Section 1: Writing and Editing Support**

ChatGPT-4o (OpenAI, May 2025)was used for the following tasks:

**Editing the Summary to meet word count requirements.**Prompt: “This summary is 425 words and the limit is 250. Please reduce to 250 while retaining the tone, text, and key findings as much as possible.”
Output: [Returns a 248-word version, keeping core content intact.]
Usage: This output was reviewed and revised with more edits and light rewording to get down to the final version.

**Formatting citations and references in Harvard style.**Prompt: “Format this list of citations in Harvard style file for Frontiers formatting.”
Output: [Returns accurately formatted entries with DOIs and access dates as needed.] Usage: All citations were verified against publisher standards and adopted.

All outputs were reviewed and edited by the human authors to ensure factual accuracy, relevance, and alignment with the study’s intent. ChatGPT-4o is not listed as an author.

**Section 2: Qualitative Data Analysis Support**

ChatGPT-4o (OpenAI, April 2025) was used for the following tasks:

**Reviewing data set and creating initial codes**Prompt: “ Please identify and label segments of the data that appear relevant to the research interest. Capture the essence of each statement without applying a predefined framework .”
Output: [Returns a list of the 24 initial codes labeled with a brief descriptive title that captures the primary message and example statements from the raw text.]

Usage: These codes were reviewed, revised, and refined by the research team and then advanced to the next phase of RTA.

**Clustering initial codes into candidate themes.**Prompt: “Here are coded excerpts from participants. Please suggest coherent theme groupings based on shared meaning.”
Output: [Returns proposed clusters such as “Cultivating Self-Worth,” “Balancing Self-Care,” and “Fostering Hope.”]
Usage: These clusters served as an initial draft and were reviewed, revised, and refined by the research team based on alignment with participant voice and study goals.

**Suggesting theme order and relationships.**Prompt: “Organize these final themes into a meaningful sequence and explain the connections between them.
Output: [Return: a linear flow model from inner strength to action]Prompt: “Consider Bronfenbrenner’s work in this organization.”
Output: [Return: a concentric model with emotional growth at the core]Prompt: “Refine this model to show connections that are networked and consider Neal and Neal 2013 paper Nested or Networked?
Output: [Return: a nested ecological model referencing Bronfenbrenner’s framework.]
Usage: All three models were included in Supplementary File 2B. Researchers annotated and interpreted the outputs to guide final theme presentation and discussion.

**Drafting theme definitions based on researcher-identified sub-themes.**Prompt: “Write a concise definition for each theme and its sub-themes based on this summary and example quotes.”

Output: [Provides short summaries using participant-informed language to define the core meaning of each theme.]
Usage: These drafts were used as a basis for the final definitions in Supplementary File 2B. All content was revised for accuracy, clarity, and theoretical fit.

All outputs were reviewed and edited by the human authors to ensure fidelity to the data, conceptual integrity, and relevance to the study’s aims. ChatGPT-4o is not listed as an author.

###

### **Section 3: Formatting and Document Preparation**

ChatGPT-4o (OpenAI, June 2025) was used for the following tasks:

**Structure and format the in-text citations in Harvard style.**Prompt: “Check the manuscript for in-text citations Harvard style format, provide list of errors.”

Output: [Provides table of in-text citation errors and corrections.]
Usage: The corrected in-text citations were edited and corrected in the manuscript to comply with Frontiers style guidelines.

**Formatting submission documents according to journal guidelines.**Prompt*:* “Please check that this section includes all required declarations for Frontiers in Climate—Climate and Health, including Funding, Conflict of Interest, Data Availability, and Acknowledgements.”
Output*:* [Returns a checklist of missing or misformatted declarations and suggests corrected formatting and phrasing for standard sections.]
Usage*:* Authors used this guidance to review and revise standard declarations, ensuring compliance with journal requirements.

**Ensuring section headings and manuscript structure matched journal template.**Prompt: “Reformat these section titles and subheadings to follow Frontiers article formatting conventions.”
Output: [Returns appropriately structured headings: 1. Introduction, 2. Methods, 3. Results, etc.]
Usage: Adopted to maintain consistency across manuscript and supplementary files.

**Validating document word counts for Abstract, Main Text, and Summary.**Prompt*:* “What is the word count of this summary? Does it meet the 250-word maximum requirement for Frontiers submissions?”
Output: [Returns exact count and recommendation to shorten two sentences.]
Usage*:* Helped confirm compliance with submission criteria.*.*

### **Model Information**

- **Name**: ChatGPT
- **Model**: GPT-4o
- **Version**: June 2024
- **Source**:<https://chat.openai.com>
- **Accessed**: February–June 2025
