# Supplementary material for: A Climate of Emotions pilot study reducing climate anxiety and strengthening resilience
Source: Research Square preprint supplement (doi:10.21203/rs.3.rs-8349463/v1), 2026-01-23
Supplement: Supplementary file 2 [file 469061340e4bd3f5393a7725.docx]

# **Supplementary File 2A:** Thematic Codebook and Coded Dataset with

AI-Supported Reflective Thematic Analysis

Purpose of this Supplementary File

This file provides a detailed record of Phases 1–5 of the Reflective Thematic Analysis (RTA) used in the qualitative portion of the study, following Braun and Clarke’s framework (2006, 2012, 2020). It includes initial codes, coded data extracts, theme clustering, and early thematic interpretations. The qualitative analysis was supported by the generative AI tool ChatGPT (GPT-4o), which assisted in summarizing data, generating codes, and proposing preliminary thematic groupings.

All AI-generated outputs were reviewed, edited, and interpreted by the research team to ensure rigour, thematic coherence, and fidelity to participants’ language. AI was not used to interpret the data or make final analytic decisions. This use of AI aligns with emerging best practices for responsible augmentation in qualitative research (Hitch, 2024). This supplementary file is shared to contribute to ongoing discourse about the ethical integration of AI tools in thematic analysis for qualitative research.

Note: Throughout this document, content labeled as (AI) indicates outputs generated by the generative AI tool ChatGPT (GPT-4o), used to support summarization, code generation, and preliminary theme development. Content labeled as (Researcher) reflects human-authored input or interpretation by the research team. All AI-generated text was critically reviewed and, where necessary, revised to ensure alignment with participants’ language and analytic rigour.

To ensure clarity and transparency in reporting, Phase 6: Establishing Theme Order and Interactions (including theme relationships, sequencing rationale, and structural modeling) is provided separately in Supplementary File 2B. Together, Files 2A and 2B comprise the full trace of the Reflective Thematic Analysis process.

## Phase 1: Familiarization with the Data

Summary: The AI repeatedly read through all 71 statements, noting their tone and content. Initial impressions indicated that the data collectively emphasized self-awareness, inner growth, community and connection, empowerment, and hope/forward-looking perspectives. Many statements highlighted a desire to embrace vulnerability, take action, or accept oneself.

(RESEARCHER): Please read and summarize your initial impressions after reading through all 71 lines of data multiple times. Note the overall tone, content, and any patterns you detect.

(AI): I read through all 71 statements repeatedly, noting their tone and content. The data collectively emphasize self-awareness, inner growth, community and connection, empowerment, and hope/forward-looking perspectives. Many statements highlight a desire to embrace vulnerability, take action, or accept oneself.

## Phase 2: Generating Initial Codes

Summary: The AI was prompted to compile initial codes derived from each statement or small clusters of statements. Each code was intended to capture the primary message without over-interpreting at this stage. Twenty-four codes were generated. While some codes could overlap, the AI was instructed to keep them distinct initially to provide a fuller understanding.

(RESEARCHER): Please identify and label segments of the data that appear relevant to the research interest. Capture the essence of each statement without applying a predefined framework.

(AI) Below is the concise list of the 24 initial codes referred to in Phase 2. Each code is labeled with a brief descriptive title that captures the primary message and example statements from the raw text.

**Table 1. Initial code numbers and labels with a brief descriptive title**

This table lists the initial 21 codes generated during Phase 2 of Braun and Clarke’s (2006) thematic analysis, each with illustrative excerpts from the raw dataset to define the meaning of the message. These codes were applied across the dataset to identify repeated patterns of meaning.

| **Code #** | **Primary Message** | **Raw Text** |
| --- | --- | --- |
| 1. | Self-Valuation | “treat myself the way I treat others,” “give myself the value I give others” |
| 2. | Opening to Connection | “opening up to feel community,” “lean into vulnerability,” “feel connected” |
| 3. | Fighting Complacency | “fight against complacency,” “never make peace with comfort” |
| 4. | Acceptance of Life / Vitality | non-English statement “Se aceitan, se acolhen… vivem o que chamamos de VIDA” |
| 5. | Internal Validation | “open to internal validation,” “I don’t need anybody’s approval” |
| 6. | Curiosity and Non-Attachment | “connect with others with curiosity and no attachment” |
| 7. | Pausing / Listening Inward | “pause and hear myself,” “pause” |
| 8. | Balancing Self-Care with Vulnerability | protect your energy/self care but be vulnerable,” “stay balanced” |
| 9. | Taking First Step / Action | “I can advocate and choose big things,” “just do it!” |
| 10. | Personal Agency / Independence | “I don’t have to rely on others,” “identify where I do have power” |
| 11. | Community Building / Shared Effort | “community building,” “connect with others,” “dream together,” “trust others for a connected community” |
| 12. | Empathy and Understanding | “understanding is selective,” “empathy is universal,” “recognize connections before differences” |
| 13. | Expressive Communication | “not using my voice but my hands,” “use my voice for change” |
| 14. | Embracing Emotions / Legitimacy | “allowing myself to feel legitimate,” “grief as lessons not failures” |
| 15. | Taking up Space | “take up SPACE with love,” “allow myself to take up space” |
| 15. | Beliefs are Important on Their Own | “my beliefs are important on their own” |
| 17. | Boundaries and Self-Preservation | “setting boundaries,” “protect space to recover” |
| 18. | Cultivating Hope and Optimism | “be more confident about the future,” “don’t give up hope,” “find spaces of hope” |
| 19. | Acknowledging Growth and Mistakes | “accept mistakes as lessons, not failures,” “be okay with things taking time” |
| 20. | Routine and Gratitude | “morning routines,” “look for good in everyday life,” “feeling grateful” |
| 21. | Action for Change | “encourage others to lean more into community,” “use my voice for change,” “take one day at a time but you are capable” |
| 22. | Vision / Dreaming Together | “being honest with my dreams so we can dream together,” “I need to change my internal value system” |
| 23. | Scarcity vs. Abundance Mindset | “scarcity cannot be my default,” “hard-earned abundance” |
| 24. | Self-Confidence and Overcoming Fear | “be brave,” “don’t be afraid of failure,” “allow myself grace” |

(Note: Some codes could overlap, but for clarity I’ve kept them distinct at this initial stage.)

Below is a text-based table listing each of the 71 raw data lines alongside the initial codes generated in Phase 2. These codes come from the concise list of 24 codes previously identified (e.g., “Self-Valuation,” “Fighting Complacency,” etc.). In some cases, a single line may match more than one code, but for clarity here, each line has been assigned to its most fitting code or small set of codes based on the Phase 2 approach.

**Table 2. Raw data coded**

The raw dataset is shown alongside the initial codes applied. This table provides transparency into the analytic process by demonstrating how participant reflections were assigned to specific codes.

| **Line #** | **Raw Text** | **Assigned Code(s)** |
| --- | --- | --- |
| 1 | To think and treat myself the way I treat other people: give myself the value I give others. | Self-Valuation (#1) |
| 2 | Opening up to feel community and drive initiatives | Opening to Connection (#2) |
| 3 | Fight against complacency | Fighting Complacency (#3) |
| 4 | Se aceitan, se acolhen, E apendios viven o que chamamos de VIDA | Acceptance of Life / Vitality (#4) |
| 5 | Opening up to feel connected | Opening to Connection (#2) |
| 6 | Open to internal validation | Internal Validation (#5) |
| 7 | Connect with others with curiosity and no attachment to the outcome | Curiosity and Non-Attachment (#6) |
| 8 | Pause and hear myself | Pausing / Listening Inward (#7) |
| 9 | Stay balanced with protecting your energy/self care but be vulnerable and trust to connect to the opposing side | Balancing Self-Care with Vulnerability (#8) |
| 10 | Lean into vulnerability | Balancing Self-Care with Vulnerability (#8) |
| 11 | Taking the first step to action | Taking First Step / Action (#9) |
| 12 | I can advocate and choose big things by myself. I don't have to rely on others. | Personal Agency / Independence (#10) |
| 13 | Community building | Community Building / Shared Effort (#11) |
| 14 | Understanding is a selective process. Empathy is a universal ability | Empathy and Understanding (#12) |
| 15 | Connection between generations | Community Building / Shared Effort (#11) |
| 16 | Use my voice for change | Action for Change (#21) |
| 17 | Not using my voice to express emotions - but using my hands | Expressive Communication (#13) |
| 18 | Identify where I do have power and own it | Personal Agency / Independence (#10) |
| 19 | Siempre me manter muito feliz | Cultivating Hope and Optimism (#18) |
| 20 | Take up SPACE with love | Taking up Space (#15) |
| 21 | Allowing myself to feel legitimate | Embracing Emotions / Legitimacy (#14) |
| 22 | My beliefs are important on their own | Beliefs are Important on Their Own (#16) |
| 23 | Setting boundaries | Boundaries and Self-Preservation (#17) |
| 24 | I can feel more empowered by supporting my own voice and passions | Personal Agency / Independence (#10) |
| 25 | Pause | Pausing / Listening Inward (#7) |
| 26 | Allow myself to take up space | Taking up Space (#15) |
| 27 | Understand I don't need anybody’s approval to be myself and not everybody is worth my time and energy | Internal Validation (#5) |
| 28 | Make time in my everyday life for connections | Community Building / Shared Effort (#11) |
| 29 | Have patience for growth | Acknowledging Growth and Mistakes (#19) |
| 30 | Support the ones that support me | Community Building / Shared Effort (#11) |
| 31 | Love fuels love, strength fuels strength, hope fuels hope | Cultivating Hope and Optimism (#18) |
| 32 | Learning more about climate change and its impacts will support me for taking action | Action for Change (#21) |
| 33 | Be more confident about the future | Cultivating Hope and Optimism (#18) |
| 34 | Accepting mistakes as lessons and not failures because we are humans | Acknowledging Growth and Mistakes (#19) |
| 35 | Morning routines | Routine and Gratitude (#20) |
| 36 | Appreciate other people and see beauty in others | Empathy and Understanding (#12) |
| 37 | Look for the good in everyday life | Routine and Gratitude (#20) |
| 38 | Be grateful and loving with yourself | Routine and Gratitude (#20) |
| 39 | Believe in my ability to have impact | Self-Confidence and Overcoming Fear (#24) |
| 40 | Just do it! | Taking First Step / Action (#9) |
| 41 | Self care, transcendent self discovery and vulnerability is useful, productive and impactful in circumstances of wide scale change. TLDR: self-care is important! | Balancing Self-Care with Vulnerability (#8) |
| 42 | Feeling grateful and thankful for what I have rather than wanting for what I lack | Routine and Gratitude (#20) |
| 43 | Find spaces of hope | Cultivating Hope and Optimism (#18) |
| 44 | Be patient, kind to myself as I try to be more comfortable with discomfort, tension and duality | Balancing Self-Care with Vulnerability (#8) |
| 45 | Going all in and committing everything I have | Action for Change (#21) |
| 46 | All the love you have for your work, your life, your art, your family– feel it and give it to yourself | Balancing Self-Care with Vulnerability (#8) |
| 47 | Be okay with things taking time and practice. It doesn't have to be perfect on the first try | Acknowledging Growth and Mistakes (#19) |
| 48 | Being open to seeing things from a different point of view | Empathy and Understanding (#12) |
| 49 | Show up | Taking First Step / Action (#9) |
| 50 | Validation, reassurance “what would my higher self do?” | Internal Validation (#5) |
| 51 | Let it be good, let it be bad. Let it be. | Embracing Emotions / Legitimacy (#14) |
| 52 | Never make peace with comfort or mediocrity | Fighting Complacency (#3) |
| 53 | Take one day at a time I believe I should be more self-confident and less shy | Self-Confidence and Overcoming Fear (#24) |
| 54 | Be more open to sharing responsibility with others and being honest with my dreams so we can dream together | Community Building / Shared Effort (#11) |
| 55 | Open up and engage more and with others | Opening to Connection (#2) |
| 56 | Be brave, don’t be afraid of failure | Self-Confidence and Overcoming Fear (#24) |
| 57 | Scarcity cannot be my default. Its time for hard-earned abundance. | Scarcity vs Abundance Mindset (#23) |
| 58 | Trust others for a connected community | Community Building / Shared Effort (#11) |
| 59 | Protect space to recover, reflect, connect, rest, create. Less “do-ing” | Balancing Self-Care with Vulnerability (#8) |
| 60 | Don't stress it out. Have more fun | Cultivating Hope and Optimism (#18) |
| 61 | Encourage others to lean more into community | Community Building / Shared Effort (#11) |
| 62 | Take life day by day. It can be hard but you are capable | Self-Confidence and Overcoming Fear (#24) |
| 63 | Your silence shouldn’t be weaponized. So don’t let it be. | Action for Change (#21) |
| 64 | To not assume judgments, to recognize connections before differences, to own my voice, take up lead! | Empathy and Understanding (#12) |
| 65 | Don’t give up hope and find the like-minds | Cultivating Hope and Optimism (#18) |
| 66 | Just try | Taking First Step / Action (#9) |
| 67 | I am going to allow myself some GRACE | Balancing Self-Care with Vulnerability (#8) |
| 68 | I need to change my internal value system | Internal Validation (#5) |
| 69 | Connected | Opening to Connection (#2) |
| 70 | Extend more love to myself and others (esp the difficult ones) | Empathy and Understanding (#12) |
| 71 | (No line was provided in the original list beyond #70. If your dataset includes a 71st item, please insert it here.) | (No code assigned) |

## Phase 3: Searching for Themes

Summary: The AI clustered the initial codes into broader themes that captured more coherent messages. It was instructed to group codes that naturally belonged together. This stage involved identifying patterns and revising theme groupings to improve clarity and representation of meaning.

(RESEARCHER): Group the initial codes into broader themes or sub-themes. Look for common threads or conceptual links that connect multiple codes.

(AI) Below are two **text-based tables** showing how coded data were **clustered into themes** during Phase 3. The **first** table presents a *preliminary grouping* (*Potential Themes*)

##

**Table 3. Potential themes and coded data** This table presents the tentative themes and subthemes developed during Phase 3 of the analysis. Each theme includes representative coded excerpts that reflect the grouping’s preliminary conceptual focus.

| **Potential Theme** | **Associated Codes (by #)** | **Notes / Representative Raw Lines** |
| --- | --- | --- |
| **Theme A: Emotional Core** | #1 Self-Valuation  #5 Internal Validation  #14 Embracing Emotions / Legitimacy | Example lines:  - “To think and treat myself the way I treat other people...” (Line 1)  - “Allowing myself to feel legitimate.” (Line 21) |
| **Theme B: Connecting & Social Ties** | #2 Opening to Connection  #11 Community Building / Shared Effort  #12 Empathy and Understanding  #6 Curiosity and Non-Attachment | Example lines:  - “Opening up to feel connected.” (Line 5)  - “Make time in my everyday life for connections.” (Line 28) |
| **Theme C: Action & Agency** | #3 Fighting Complacency  #9 Taking First Step / Action  #10 Personal Agency / Independence  #21 Action for Change  #24 Self-Confidence and Overcoming Fear | Example lines:  - “Fight against complacency.” (Line 3)  - “I can advocate and choose big things by myself. I don’t have to rely on others.” (Line 12) |
| **Theme D: Self-Care & Growth** | #7 Pausing / Listening Inward  #8 Balancing Self-Care with Vulnerability  #17 Boundaries and Self-Preservation  #19 Acknowledging Growth and Mistakes  #20 Routine and Gratitude | Example lines:  - “Pause and hear myself.” (Line 8)  - “Accepting mistakes as lessons.” (Line 34) |
| **Theme E: Hope & Positivity** | #18 Cultivating Hope and Optimism  #23 Scarcity vs. Abundance Mindset  #4 Acceptance of Life / Vitality  #16 Beliefs are Important on Their Own | Example lines:  - “Be more confident about the future.” (Line 33)  - “Scarcity cannot be my default. It's time for hard-earned abundance.” (Line 57) |
| **Theme F: Communication / Expression** | #13 Expressive Communication  #15 Taking up Space  #22 *(Placeholder / Unused)* | Example lines:  - “Not using my voice to express emotions– but using my hands.” (Line 17)  - “Take up SPACE with love.” (Line 20) |

**Note:** These *potential* themes were **later reviewed** (Phase 4) and **some merged** or **renamed** into the **final 5 themes** listed in Table 2.

The 24 initial codes were clustered into broader potential themes based on semantic similarity, conceptual alignment, and recurrence across the dataset. The process followed Braun and Clarke’s (2006, 2012, 2020) guidance for grouping codes that captured shared meanings while retaining nuance considering the following logic:

- **Common affective tone** (e.g., codes expressing confidence, warmth, or vulnerability)
- **Developmental progression** (e.g., codes reflecting self-insight vs. outward engagement)
- **Shared language or framing** (e.g., references to action, belonging, or growth)
- **Frequency and salience** across multiple statements

This initial clustering yielded **six potential themes**, but there was notable conceptual overlap. For example:

- **Early Group A**: Contained codes like *Self-Compassion*, *Vulnerability*, *Permission to Feel*, *Boundary Setting* → initially called **“Emotional Honesty”**
- **Early Group B**: Included *Belonging*, *Being Seen*, *Support from Others* → called **“Relational Anchors”**
- **Early Group C**: Combined *Taking Action*, *Using My Voice*, *Growth Mindset* → called **“Activating Strength”**
- **Early Group D**: Included *Finding Hope*, *Reclaiming Optimism*, *Looking Forward* → called **“Future Orientation”**
- **Early Group E**: *Balance*, *Overwhelm Reduction*, *Prioritizing Self* → called **“Sustainable Self”**
- **Early Group F**: *Art as Voice*, *Naming Emotions*, *Creative Processing* → called **“Expressive Tools”**

#### **Revision and consolidation**

Through iterative review, several issues emerged:

- **Group A and E** overlapped conceptually in terms of internal regulation and care. These were merged into **Theme 2: Balancing Self-Care, Vulnerability, and Emotional Growth**
- **Group B and F** had partial overlap, but *Expressive Tools* was too narrow and descriptive. Relevant codes were redistributed to other themes. *Relational Anchors* evolved into **Theme 4: Connecting and Building Community**
- **Group C** aligned well with a developmental progression toward action and became **Theme 3: Personal Agency and Action**
- **Group D** remained mostly intact and became **Theme 5: Fostering Hope and Positive Outlook**
- A small number of codes from multiple groups reflected *validation*, *worthiness*, and *inner resilience*. These were grouped into a new **Theme 1: Cultivating Self-Worth and Inner Strength**

This phase helped reduce overlap and clarify theme boundaries. The final themes:

- Reflected both **internal and external dimensions** of resilience
- Represented a **progression from internal awareness to outward engagement**
- Were flexible enough to allow for overlapping emotional experiences while still distinct in focus

## Phase 4: Reviewing Themes

Summary: The AI was prompted to answer a series of key questions from Braun and Clarke (2006, 2012) to assess the quality of potential themes.

(RESEARCHER): Review each potential theme using the following questions: Is this a theme or just a code? What does the theme tell us about the data and research questions? What are the boundaries of this theme? Are there enough data to support it? Are the data too diverse to be cohesive? Please explain your answers.

(AI ) Here are responses to 6 questions (Braun and Clarke, 2012) about potential themes. Below is a text-based table summarizing the Phase 4 review of each potential theme against the six key questions often used to evaluate candidate themes (adapted from Braun and Clarke, 2012). The potential themes reflect the groupings from Table 1 (Phase 3). For each theme, the table addresses:

1. Theme or Code: Is this genuinely a theme or does it remain a single code?
2. Usefulness: Does the theme tell us something meaningful about the dataset and research question(s)?
3. Boundaries: What does the theme include and exclude?
4. Sufficient Data: Are there enough data to support the theme (i.e., is it “thick” or “thin”)?
5. Data Coherence: Are the data cohesive, or are they too wide-ranging or diverse?
6. Decision: How did we handle it in the final thematic structure (keep, merge, revise, or discard)?

##

## **Table 4. Phase 4 review and evaluation of potential themes using Braun and Clarke’s questions**

## In this table, each potential theme is evaluated using Braun and Clarke’s (2012) guiding questions for thematic coherence. The responses show how the themes were refined for internal consistency and distinctiveness.

| **Potential Theme** | **(1) Theme or Code?** | **(2) Usefulness** | **(3) Boundaries** | **(4) Sufficient Data?** | **(5) Data Coherence?** | **(6) Decision** |
| --- | --- | --- | --- | --- | --- | --- |
| **Theme A: Emotional Core** | Considered a potential theme, not just a single code, because it comprises multiple codes (e.g., #1, #5, #14). | Reveals how participants perceive & legitimize emotions and self-worth, valuable for understanding internal emotional work. | Includes lines emphasizing self-valuation, legitimacy, and internal validation; excludes purely social or action-based content. | Yes, multiple data lines revolve around self-value & emotional legitimacy; moderately robust. | Data appear cohesive, describing personal emotional acceptance & self-legitimacy. | Refined into “Cultivating Self-Worth and Inner Strength” for the final model. |
| **Theme B: Connecting & Social Ties** | Seen as a robust theme, not just a code; merges empathy, community, and curiosity. | Helps clarify how participants form supportive bonds, relevant to our focus on group-based resilience. | Encompasses lines on opening up, community building, empathy, curiosity; excludes purely individual or self-focused statements. | Plenty of statements referencing group bonding, empathy, and open-minded connection. | Fairly coherent: codes unify around forming social ties & building relationships. | Merged into “Connecting and Building Community” in final structure. |
| **Theme C: Action & Agency** | Yes, a theme: combines fighting complacency, first steps, personal agency, & self-confidence/fear. | Highly relevant: clarifies how participants move from internal states to outward behavior, central to climate activism. | Focuses on stepping outside comfort zones and taking tangible steps; excludes themes of emotional introspection or group synergy. | Sufficient data: multiple lines about action-taking, activism, and personal drive. | Data coherent in describing outward actions and sense of efficacy. | Became “Personal Agency and Action” in final set. |
| **Theme D: Self-Care & Growth** | A theme, not just a code: multiple codes overlap around pausing, boundaries, growth, and routine. | Very useful: clarifies internal processes that support resilience, distinct from emotional identity or outward connectivity. | Boundaries revolve around introspection (pausing, self-care, coping with mistakes); excludes action or deep external connections. | Rich data: repeated references to “pause,” “protect space,” “accept mistakes,” and building everyday routines. | Data coherent, reflecting how participants handle emotional well-being & personal growth. | Evolved into “Balancing Self-Care, Vulnerability, and Emotional Growth.” |
| **Theme E: Hope & Positivity** | Yes, theme: includes codes on optimism, acceptance of life, abundance vs. scarcity, and beliefs in positivity. | Directly addresses participants’ sense of forward-looking optimism, which is key to climate resilience. | Consists of lines about finding hope, gratitude, positive outlook; excludes immediate self-care or purely external action. | Enough references (e.g., “be more confident,” “love fuels love”), so it is “thick” enough to stand as a theme. | Data coherent around positivity and hope. | Renamed as “Fostering Hope and Positive Outlook” in final version. |
| **Theme F: Communication / Expression** | Uncertain if it’s a standalone theme or best merged; includes expressive communication & taking up space. | Possibly redundant with “Emotional Core” and “Action,” but describes outward self-expression. Could be valuable or folded in. | Boundaries: purely focuses on expression modalities (e.g., voice, body, etc.), might overlap with self-worth or action codes. | Data somewhat sparse (codes #13, #15). Possibly merged into existing themes on self-worth or personal agency. | Data a bit scattered; expression often co-occurs with self-worth or group synergy. | Merged partially under “Cultivating Self-Worth & Inner Strength” & “Personal Agency.” |

Explanatory Notes

- Theme or Code?: Explores whether the grouping is broad enough to be a theme versus an individual code.
- Usefulness: Considers if it provides meaningful insight for the research question(s).
- Boundaries: Defines inclusions/exclusions to keep the theme coherent.
- Sufficient Data?: Assesses whether enough examples support each theme.
- Data Coherence?: Checks if lines in the theme form a coherent pattern or if they’re too varied.
- Decision: Describes the final outcome—whether the potential theme was kept, merged, or renamed in the final structure.

These Phase 4 answers guided the refining of the 6 potential themes into the 5 final themes described in subsequent phases.

Phase 5: Defining and Naming Themes

Summary: The AI was asked to create definitions for each theme, provide representative quotes, and clarify what is included and excluded from each theme’s scope.

(RESEARCHER): Refine each theme’s scope and name. Provide a clear definition and include quotes that exemplify the core idea. Clarify what belongs within each theme and what does not.

(AI) Below is a text-based table presenting the final five themes identified in Phase 5, along with (1) a full definition, (2) examples from the data, and (3) boundaries—that is, what each theme includes and excludes.

##

##

##

## **Table 5. Final themes with definitions, examples, and boundaries**

## The finalized five themes are defined here with accompanying data excerpts and explanations of their scope and boundaries. This table clarifies how the themes differ from one another and the specific aspects of meaning each theme captures.

| **Theme** | **Definition** | **Representative Examples** | **Boundaries (Inclusions / Exclusions)** |
| --- | --- | --- | --- |
| **1. Balancing Self-Care, Vulnerability, and Emotional Growth** | Focuses on internal processes like pausing, setting boundaries, embracing mistakes, and nurturing mental/emotional well-being. Emphasizes vulnerability as a constructive force, enabling honest self-discovery and growth. | - “Stay balanced with protecting your energy/self care but be vulnerable and trust.” (Line 9)  - “Accepting mistakes as lessons and not failures...” (Line 34)  - “I am going to allow myself some GRACE.” (Line 67) | Includes: Pausing, self-compassion, mindful introspection, setting boundaries, embracing imperfection, healing practices, recharging.  Excludes: Explicit action steps directed at the external world, purely social connections, or direct hope-building unless strongly tied to personal emotional upkeep. |
| **2. Cultivating Self-Worth and Inner Strength** | Centers on internal validation, recognizing personal worth, shifting from scarcity to abundance, and affirming legitimacy of one’s feelings and beliefs. Participants convey a sense of deserving space and respect. | - “To think and treat myself the way I treat other people: give myself the value I give others.” (Line 1)  - “Allowing myself to feel legitimate.” (Line 21)  - “Scarcity cannot be my default. It’s time for hard-earned abundance.” (Line 57) | Includes: Affirmations of personal value, moving away from others’ approval, reframing scarcity beliefs, taking up space.  Excludes: Emphasis on outward activism, communal ties, or collective hope if not related to building one’s inner worth. |
| **3. Fostering Hope and Positive Outlook** | Reflects optimism, gratitude, focusing on “what might be,” finding good in daily life, and reframing negativity into potential. Participants describe forward-looking mindsets, seeking possibility rather than limitation. | - “Be more confident about the future.” (Line 33)  - “Find spaces of hope.” (Line 43)  - “Feeling grateful and thankful for what I have...” (Line 42) | Includes: Expressions of hope, abundance, confident outlook, seeing possibility, daily positivity, gratitude.  Excludes: Direct self-care or relationships (unless they specifically build optimism) and any calls to action unless they relate to an internal sense of hope. |
| **4. Connecting and Building Community** | Encompasses how participants engage with peers, collaborators, or communities, emphasizing mutual support, shared dreaming, empathy, curiosity, and open-mindedness. Highlights relationships or small-group synergy as key to resilience. | - “Connect with others with curiosity and no attachment to the outcome.” (Line 7)  - “Community building.” (Line 13)  - “Be more open to sharing responsibility with others and being honest with my dreams so we can dream together.” (Line 54) | Includes: Social bonding, empathy, trust, building alliances, group synergy, open-minded curiosity toward others.  Excludes: Strictly personal introspection, personal emotional work without reference to others, or outward climate action unless it explicitly fosters communal ties. |
| **5. Personal Agency and Action** | Involves stepping out of comfort zones, fighting complacency, and transforming intent into concrete steps. Includes having the courage to overcome fear, “just do it” attitudes, and proactive use of one’s voice to bring real-world change. | - “Fight against complacency.” (Line 3)  - “Taking the first step to action.” (Line 11)  - “Use my voice for change.” (Line 16)  - “Just do it!” (Line 40) | Includes: Tangible activism, daily steps, confronting fear, advocating, speaking out, self-efficacy in action.  Excludes: Purely inward emotional states or interpersonal connection references unless directly tied to mobilizing action or externalized change. |

Notes on Phase 5

- Definitions: Provide the main conceptual focus for each theme.
- Representative Examples: Illustrate how participants’ raw statements map onto the theme’s core idea.
- Boundaries: Indicate where each theme starts and stops to prevent overlap (e.g., focusing on internal vs. social or action-based content).

These definitions, examples, and boundaries reflect the refined thematic structure from Phase 5 of the Reflective Thematic Analysis process.

##

##

##

##

##

##

**Table 6. Final list of 5 themes and coded data**

This table displays each of the five final themes along with all associated coded data. It provides a comprehensive overview of the full dataset as organized by thematic structure.

| **Final Theme** | **Codes Included** | **Representative Raw Lines** |
| --- | --- | --- |
| **1. Balancing Self-Care, Vulnerability, and Emotional Growth** | #7 Pausing / Listening Inward  #8 Balancing Self-Care with Vulnerability  #17 Boundaries and Self-Preservation  #19 Acknowledging Growth and Mistakes  #20 Routine and Gratitude | - “Pause and hear myself.” (Line 8)  - “Stay balanced with protecting your energy/self care but be vulnerable.” (Line 9)  - “Accepting mistakes as lessons...” (Line 34) |
| **2. Cultivating Self-Worth and Inner Strength** | #1 Self-Valuation  #5 Internal Validation  #14 Embracing Emotions / Legitimacy  #16 Beliefs are Important on Their Own  #23 Scarcity vs. Abundance Mindset (partial) | - “To think and treat myself the way I treat other people...” (Line 1)  - “Allowing myself to feel legitimate.” (Line 21)  - “Scarcity cannot be my default. It’s time for hard-earned abundance.” (Line 57) |
| **3. Fostering Hope and Positive Outlook** | #18 Cultivating Hope and Optimism  #4 Acceptance of Life / Vitality (partial)  #23 Scarcity vs. Abundance Mindset (partial) | - “Be more confident about the future.” (Line 33)  - “Find spaces of hope.” (Line 43)  - “Feeling grateful and thankful for what I have...” (Line 42) |
| **4. Connecting and Building Community** | #2 Opening to Connection  #6 Curiosity and Non-Attachment  #11 Community Building / Shared Effort  #12 Empathy and Understanding | - “Opening up to feel community and drive initiatives.” (Line 2)  - “Connect with others with curiosity and no attachment...” (Line 7)  - “Make time in my everyday life for connections.” (Line 28) |
| **5. Personal Agency and Action** | #3 Fighting Complacency  #9 Taking First Step / Action  #10 Personal Agency / Independence  #21 Action for Change  #24 Self-Confidence and Overcoming Fear | - “Fight against complacency.” (Line 3)  - “Taking the first step to action.” (Line 11)  - “I can advocate and choose big things by myself. I don't have to rely on others.” (Line 12)  - “Just do it!” (Line 40) |

**Notes:**

- Some codes (e.g., #4 Acceptance of Life / Vitality, #23 Scarcity vs Abundance Mindset) were **split** between Theme 2 and Theme 3 vs. Theme 1, depending on context.
- **Code #13** (Expressive Communication), **#15** (Taking up Space), etc., **merged** into themes related to expression, self-worth, or action.

**Note:** To ensure transparency in reporting, Phase 6: Establishing Theme Order and Interactions, including theme relationships, sequencing rationale, and structural modeling, is provided separately in Supplementary File 2B. Together, Files 2A and 2B comprise the full trace of the Reflective Thematic Analysis process.

# 
