# Supplementary material for: A Climate of Emotions pilot study reducing climate anxiety and strengthening resilience
Source: Research Square preprint supplement (doi:10.21203/rs.3.rs-8349463/v1), 2026-01-23
Supplement: Supplementary file 3 [file 4e7673ba075d23d19a98f89d.docx]

## **Appendix A. Inventory of Climate Emotions (ICE) Questions disaggregated by Emotional Construct**

Perhaps you have heard that the Earth is currently experiencing climate change. The aim of this questionnaire is to examine your feelings on this subject.
Rate the extent to which the following statements apply to you. For each statement, select one answer on the scale from “strongly disagree” to “strongly agree”.

This questionnaire is not intended to verify your knowledge, therefore there are no right or wrong answers. Choose the answer that best describes what you feel.

Response scale

1. Strongly disagree
2. Somewhat disagree
3. Neither agree, nor disagree
4. Somewhat agree
5. Strongly agree

Climate Isolation

1. I feel like one of the few people who actually understand what climate change entails.
2. I feel lonely because most of the people around me don’t care about climate change as much as I do.
3. I feel lonely because it’s difficult to talk about my climate change concerns with other people.
4. I feel alienated because society considers concerns for climate change as something strange.

Climate Anxiety

1. Thinking about climate change makes me fear for the future of our children.
2. I am overwhelmed by the awareness of the approaching climate disaster.
3. Everything seems uncertain because of climate change.
4. I fear how climate change will affect me and my loved ones.

Climate Powerlessness

1. I feel confused about what I can do to reduce climate change.
2. I am overwhelmed by how many aspects of life would need to be changed to limit climate change.
3. As an individual, I feel powerless with little agency over what happens with the climate.
4. I feel helpless when I think of how difficult it is to live in a climate-friendly way.

Climate Enthusiasm

1. The increasing public engagement with climate change gives me hope.
2. I believe that there are emerging solutions that will allow us to stop climate change.
3. Concrete actions for the climate allow me to be optimistic about the future.
4. Social mobilization in the fight against climate change makes me feel that together we can achieve this goal.
