# Supplementary material for: A Climate of Emotions pilot study reducing climate anxiety and strengthening resilience
Source: Research Square preprint supplement (doi:10.21203/rs.3.rs-8349463/v1), 2026-01-23
Supplement: Supplementary file 4 [file 654c5aa98cbcaedb15d6d916.docx]

# **Supplementary File 2B: Theme Development and Structural Modeling (Phase 6 of Reflective Thematic Analysis)**

AI-Supported Reflective Thematic Analysis

Purpose of this Supplementary File
This file, together with Supplementary File 2A, provides the full trace of the Reflective Thematic Analysis (RTA) used in this study. While Supplementary File 2A documents Phases 1 to 5 (initial coding and early theme development), this file presents Phase 6. This phase includes the interpretive logic and structural modeling used to illustrate the relationships among the final themes and to support theoretical coherence in the qualitative analysis.

Phase 6: Establishing Theme Order and Interactions

This phase includes:
The research prompts and AI-generated responses for each model
Visual diagrams of three structural models
Rationales and interpretations for each version

The three structural models are:

1. Linear Model – a one-directional sequence from internal to external themes
2. Concentric Inside-Out Model – a nested representation of emotional growth
3. Ecological Systems Network Model – based on Bronfenbrenner’s ecological systems theory as adapted by Neal and Neal (2021)

The AI tool ChatGPT (GPT-4o) was used to generate draft descriptions and diagrams. All outputs were reviewed and revised by the research team to ensure analytic rigour and fidelity to the data. This file preserves the full AI-generated text to document the analytical reasoning and iterative modeling process used to develop a coherent thematic structure.

**First Version Theme Order (Linear Progression):**This section presents the first attempt to sequence the five final themes in a coherent reporting order. The focus at this stage was to explore logical relationships and potential progression among the themes based on early interpretation. The AI tool was used to generate a draft structure and accompanying rationale, which was then reviewed by the research team.

(RESEARCHER): Please organize the final themes in a coherent order that tells a meaningful story. Identify relationships and sub-themes. Consider using visual or schematic diagrams to clarify how the themes interact.

(AI) A logical sequence builds from the internal (Theme 1) to the relational (Theme 2), to outward expression (Theme 3), inward emotional management (Theme 4), and the overarching emotional lens for the future (Theme 5). One possible reporting order:

1. Cultivating Self-Worth and Inner Strength (foundation: developing personal worth)
2. Balancing Self-Care, Vulnerability, and Emotional Growth (introspective emotional management)
3. Fostering Hope and Positive Outlook (shifting into a positive mindset)
4. Connecting and Building Community (expanding outward to others)
5. Personal Agency and Action (turning all of the above into real-world steps)

(Or you can reorder them to highlight your study’s main interest. The key is to ensure a coherent flow.)

## **Diagram of First Theme Order Interactions**

This is a text-based diagram showing how these themes might connect.Solid lines show natural hierarchy (e.g., a sub-theme or direct progression). Dotted lines represent mutual influence or synergy (e.g., fostering hope can strengthen community connection; building community might feed back into personal agency, etc.).

This visual highlights how each theme is distinct yet interconnected: internal states (Theme 1) influence the desire to connect (Theme 2), which fosters action (Theme 3), supported by self-care (Theme 4) and sustained by a hopeful, positive outlook (Theme 5). The lines indicate that these processes interact and reinforce one another.

**┌─────────────────────────────────┐**

**│ Theme 1: Cultivating │**

**│ Self-Worth & Inner Strength │**

**└─────────────────────────────────┘**

**| .**

**| (Self-esteem . influences ability to**

**| & belief) . share & connect)**

**v .**

**┌─────────────────────────────────┐**

**│ Theme 2: Balancing Self-Care, │**

**│ Vulnerability & Emotional**

**│ Growth │**

**└─────────────────────────────────┘**

**^ . |**

**| . (Community may |**

**(Emotional .|.... . bolster hope & | (Leads to group action,**

**expression) . . personal resilience) | activism synergy)**

**| v**

**┌─────────────────────────────────┐**

**│ Theme 3: Personal Agency & │**

**│ Action │**

**└─────────────────────────────────┘**

**^ |**

**| |**

**. (Internal well-being .**

**(Clarity & . fosters taking real . (Creates feedback loop)**

**calm) . steps) .**

**| |**

**v |**

**┌─────────────────────────────────┐**

**│ Theme 4: Connecting & │**

**│ Building Community │**

**└─────────────────────────────────┘**

**^ .**

**| . (Hope & positivity**

**(Positive .......... can shape inner**

**mindset) . self-care practices)**

**| .**

**v .**

**┌─────────────────────────────────┐**

**│ Theme 5: Fostering Hope & │**

**│ Positive Outlook │**

**└─────────────────────────────────┘**

The linear relationships between themes are depicted in Figure 2.

**
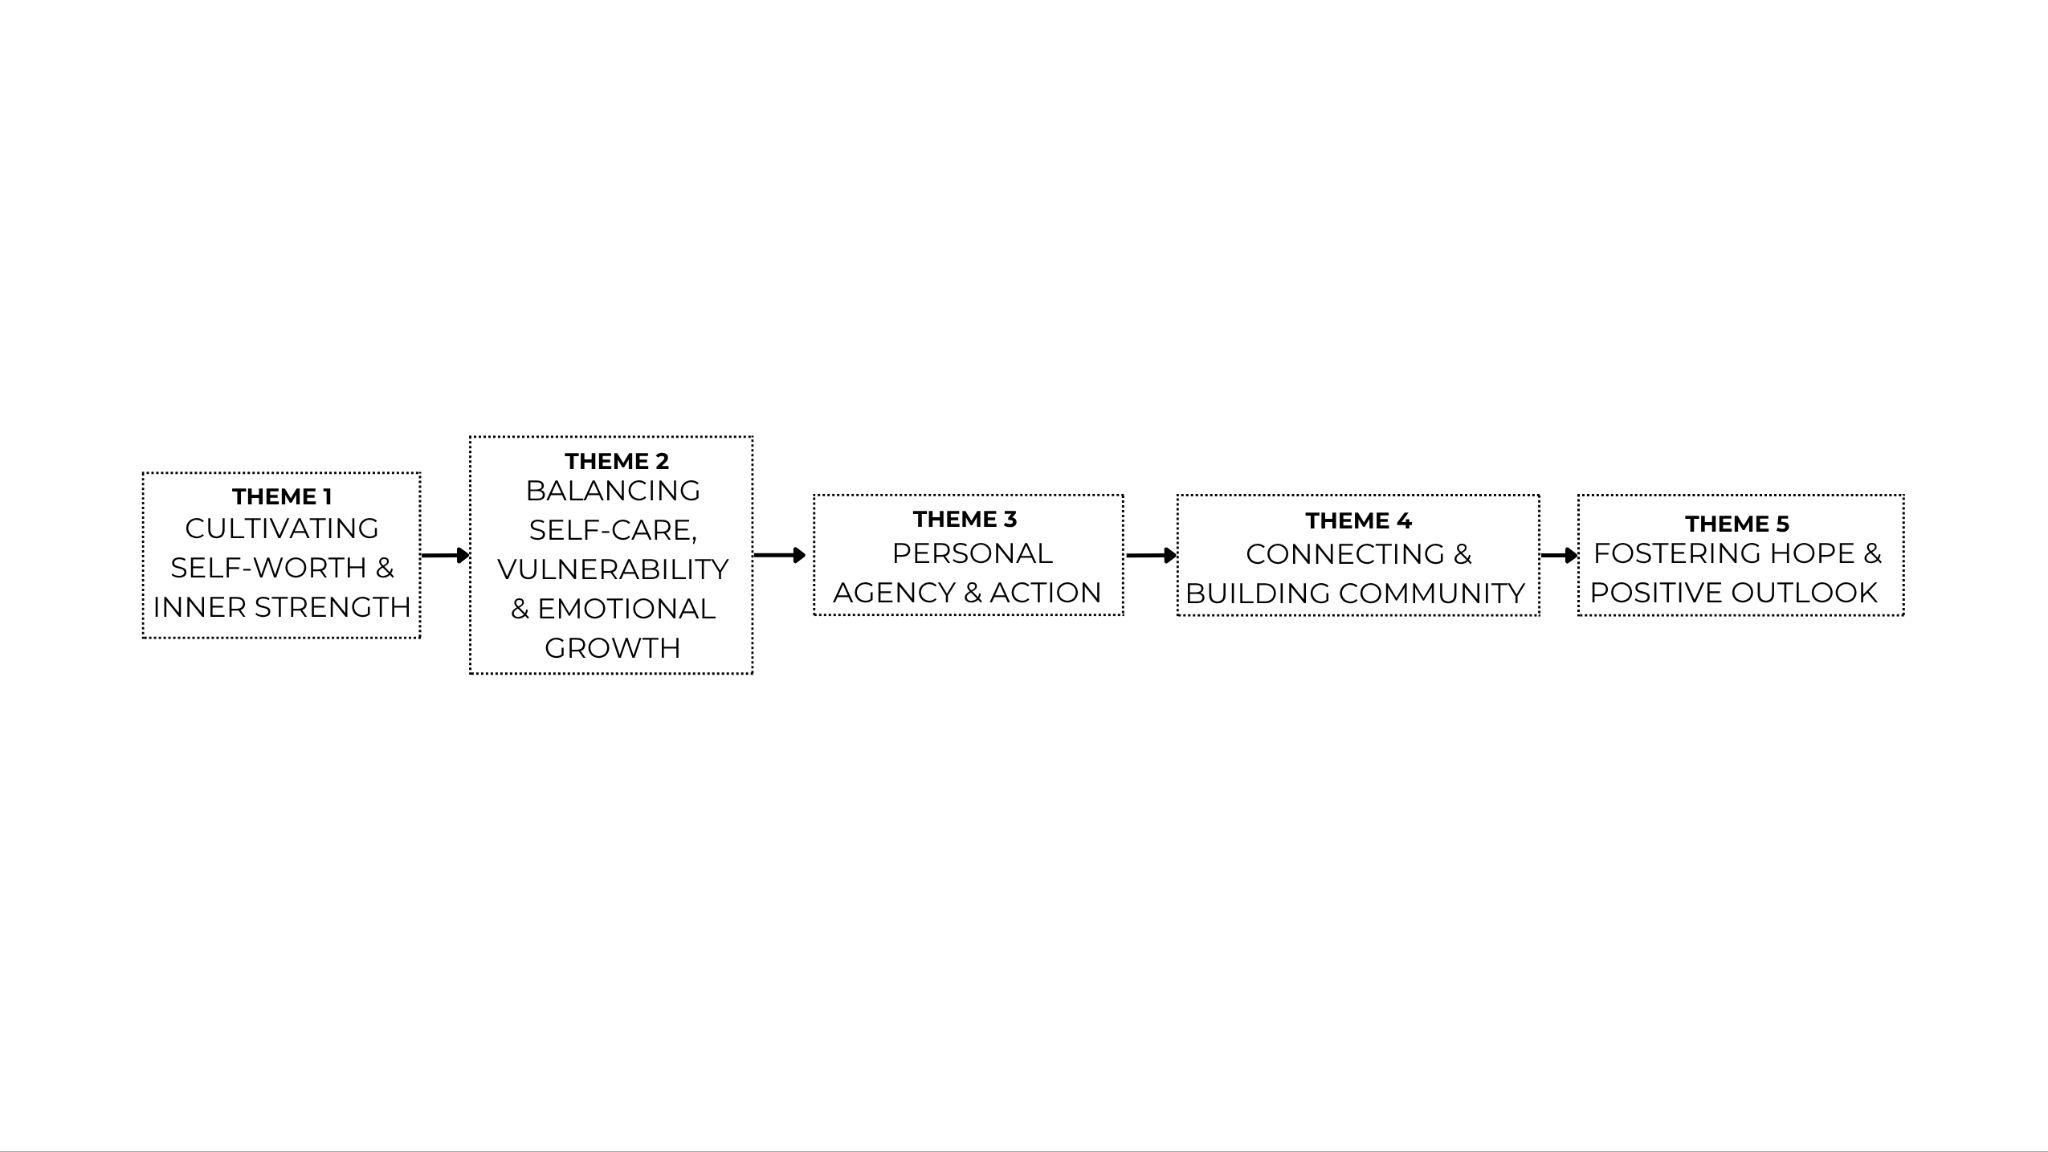
Figure 2.** Linear model of theme progression.Text-based diagram illustrating the linear sequence of the five final themes and their interactions, developed during Phase 6 of the Reflective Thematic Analysis.

**Second Version Theme Order (Concentric “Inside-Out” Model)**The following section presents the second interpretive model developed during Phase 6 of the Reflective Thematic Analysis. This concentric structure conceptualizes Balancing Self-Care, Vulnerability, and Emotional Growth (Theme 2) as the emotional core, with other themes radiating outward. The arrangement was generated through AI-supported analysis and illustrates an “inside-out” progression of resilience, from internal regulation to community action.

(RESEARCHER): Consider shifting to a center-outward logic where emotional growth (Theme 2) forms the core and other themes build outward from it.

(AI) Below is an alternate arrangement for Phase 6 (defining, ordering, and visualizing themes) that centers on the idea of emotional growth as the core from which other thematic layers radiate outward. This approach frames “Balancing Self-Care, Vulnerability, and Emotional Growth” as the innermost layer (Theme 2), with the other themes encircling it. In this conceptualization, Theme 2 (Balancing Self-Care, Vulnerability, and Emotional Growth) forms the innermost ring. From this emotional core, participants cultivate a sense of worth, develop a hopeful perspective, then expand into communal spaces, and finally direct their energy toward personal agency and action at the outermost ring. This reflects an inside-out progression, where nurturing internal well-being sets the stage for meaningful outward engagement and, ultimately, individual initiative for change.

Theme 2 (Center): Balancing Self-Care, Vulnerability, and Emotional Growth

- Central Role: Emotional wellness, reflection, and acceptance form the bedrock of participants’ growth.
- Sample Quotes:
  - “Stay balanced with protecting your energy/self care but be vulnerable and trust.”
  - “Accepting mistakes as lessons and not failures.”
  - “Pause and hear myself.”

Theme 1 (Second Circle): Cultivating Self-Worth and Inner Strength

- Builds from the Center: Once individuals feel emotionally grounded, they can begin valuing themselves, gaining confidence, and overcoming scarcity mindsets.
- Sample Quotes:
  - “Treat myself the way I treat others: give myself the value I give others.”
  - “Allowing myself to feel legitimate.”
  - “Scarcity cannot be my default.”

Theme 5 (Third Circle): Fostering Hope and Positive Outlook

- Adds Optimism: After establishing emotional stability (core) and self-worth (second circle), participants develop gratitude, future-mindedness, and resilience.
- Sample Quotes:
  - “Be more confident about the future.”
  - “Feeling grateful and thankful for what I have rather than wanting for what I lack.”
  - “Don’t give up hope and find the like-minds.”

Theme 3 (Fourth Circle): Personal Agency and Action

- Active Expression: The final ring encompasses outward, tangible steps—confronting complacency, exercising one’s voice, and taking daily or activist actions.
- Sample Quotes:
  - “Fight against complacency.”
  - “I can advocate and choose big things by myself. I don’t have to rely on others.”
  - “Taking the first step to action.”

Theme 4 (Outermost Circle): Connecting and Building Community

- Social Extension: With confidence and hope in place, individuals become more open to forging deeper connections and cooperating with others for mutual support.
- Sample Quotes:
  - “Connect with others with curiosity and no attachment to the outcome.”
  - “Be more open to sharing responsibility with others and being honest with my dreams so we can dream together.”
  - “Trust others for a connected community.”

## **Diagram of Second Theme Order**

Below is a text-based schematic showing the core (Theme 2) at the center, moving outward to Theme 1, then Theme 5, Theme 3, and ultimately Theme 4 at the perimeter. Sub-themes are listed as bulleted items within each layer. Solid lines represent hierarchical or stepwise relationships, while dotted lines indicate thematic interplay or synergy.

┌───────────────────────────────────────────────────────────┐

│ (OUTERMOST)THEME 4: CONNECTING & BUILDING COMMUNITY │

│ Sub-themes: │

│ · (4a) Building Trust │

│ · (4b) Shared Dreaming │

│ · (4c) Collective Synergy │

└───────────────────────────────────────────────────────────┘

^ . . . . . (4a ↔ 2a Embracing Vulnerability)

| (Community flourishes with hope & self-worth)

┌───────────────────────────────────────────────────────────┐

│ THEME 3: PERSONAL AGENCY & ACTION │

│ Sub-themes: │

│ · (3a) Taking the First Step │

│ · (3b) Using One’s Voice │

│ · (3c) Facing Fear & Moving Past Comfort │

└───────────────────────────────────────────────────────────┘

^ . . . . . . . (Interplays with 4b, 1a)

| (Action grows from synergy between self-worth, hope)

┌───────────────────────────────────────────────────────────┐

│ THEME 5: FOSTERING HOPE & POSITIVE OUTLOOK │

│ Sub-themes: │

│ · (5a) Gratitude │

│ · (5b) Future Orientation │

│ · (5c) Maintaining Optimism Through Challenges │

└───────────────────────────────────────────────────────────┘

^ . . . . (5a ↔ 1b Overcoming Scarcity Mindset)

| (Hope thrives after establishing self-value)

┌───────────────────────────────────────────────────────────┐

│ THEME 1: CULTIVATING SELF-WORTH & INNER STRENGTH │

│ Sub-themes: │

│ · (1a) Affirming Personal Worth │

│ · (1b) Overcoming Scarcity Mindset │

│ · (1c) Reclaiming Legitimacy │

└───────────────────────────────────────────────────────────┘

^ . . . . (1a ↔ 2c Accepting Imperfection)

| (Self-worth built from emotional core)

┌───────────────────────────────────────────────────────────┐

│ THEME 2 (CENTER): BALANCING SELF-CARE, VULNERABILITY, │

│ & EMOTIONAL GROWTH │

│ Sub-themes: │

│ · (2a) Embracing Vulnerability │

│ · (2b) Setting Boundaries │

│ · (2c) Accepting Imperfection │

└───────────────────────────────────────────────────────────┘

(RESEARCHER): Please revise the theme arrangement using Bronfenbrenner’s Ecological Systems Theory. Consider how themes can be visualized in concentric layers and also reflect networked interconnections across multiple ecological systems.

(AI):

1. Theme 2 to Theme 4:
   - When someone nurtures emotional well-being (Theme 2), they are more prepared to establish supportive connections (Theme 4).
   - In Bronfenbrenner’s terms, the healthier the individual is at the microsystem level, the more effectively they can engage with social groups in the mesosystem.
2. From Theme 1 to Theme 5:
   - Feeling “legitimate” and worthy (Theme 1) often fosters optimism and gratitude (Theme 5).
   - Within EST, self-worth shaped in the microsystem (e.g., supportive parents, teachers) enhances an individual’s positive outlook, which they carry into multiple environments (mesosystem, exosystem).
3. Theme 4 Shaping Theme 3:
   - Engagement in a supportive community (Theme 4) can spur personal agency and broader activism (Theme 3).
   - In EST, the mesosystem and exosystem relationships may provide resources, encouragement, or role models that enhance an individual’s capability to act at higher societal levels (macrosystem).
4. Theme 2 is at the center. Sub-themes 2a, 2b, 2c revolve around managing inner emotional processes.
5. Theme 1 (Cultivating Self-Worth) builds on the emotional grounding from Theme 2.
6. Theme 5 (Hope) further expands once self-worth is established.
7. Theme 3 (Action) becomes more robust with hope and a sense of worth.
8. Theme 4 (Community)sits at the outermost layer, benefiting from the synergy of all inner layers.

Dotted lines show how particular sub-themes may reinforce each other. For example, sub-theme (4b) Shared Dreaming influences (3b) Using One’s Voice, and sub-theme (2a) Embracing Vulnerability supports (4a) Building Trust in a group context.

The concentric theme structure is illustrated in Figure 3.

**
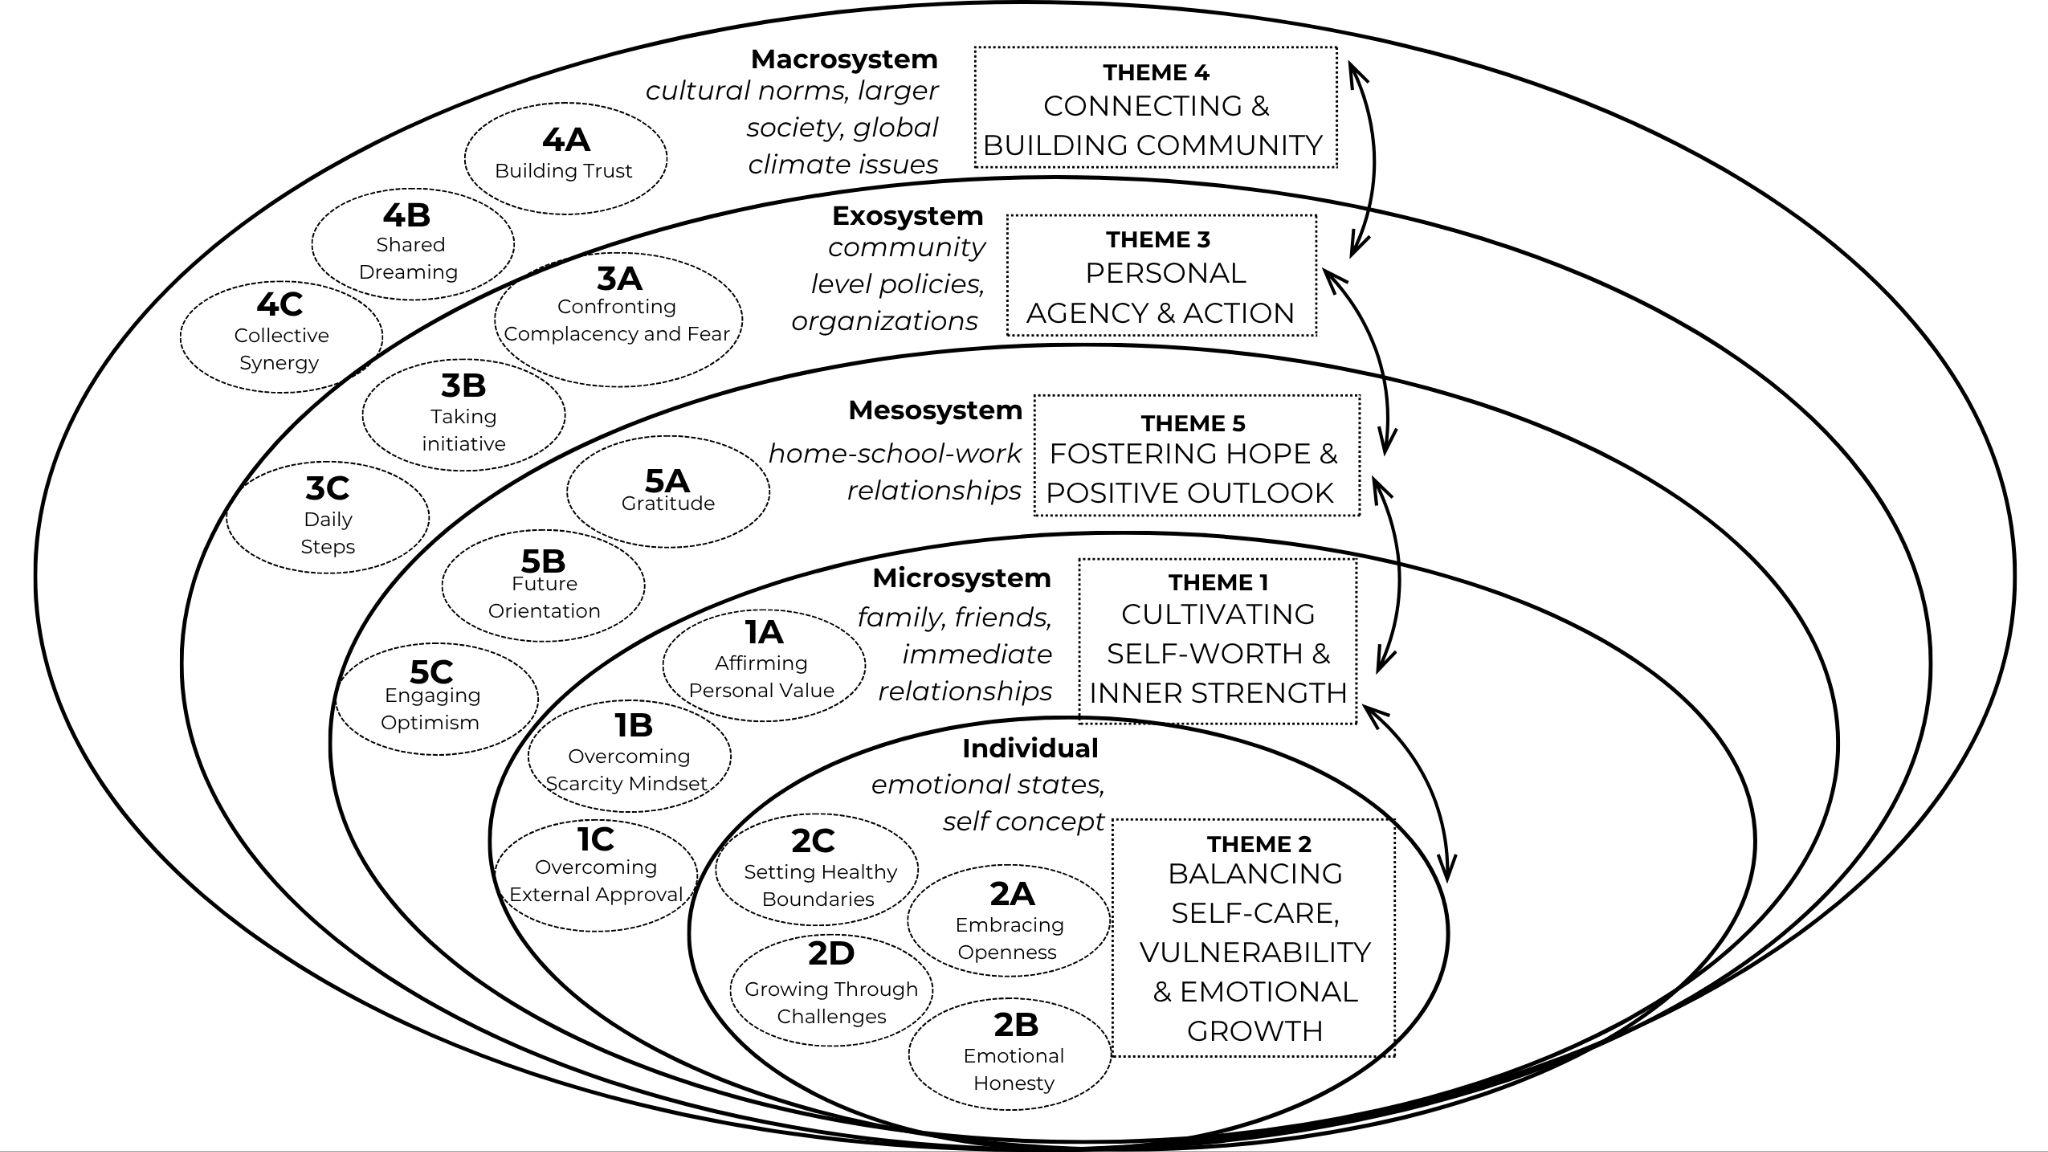
**

**Figure 3.** Concentric model of theme interactions with Theme 2 at the core, showing nested relationships between internal emotional growth, self-worth, hope, action, and community.

**Third Version Theme Order:**

The following section presents a third interpretive framework developed during Phase 6 of the Reflective Thematic Analysis (RTA). This version adapts the final five themes using an ecological systems lens, drawing on Bronfenbrenner’s Ecological Systems Theory (1979) as reconceptualised by Neal and Neal (2021). While retaining the inner-to-outer development of previous models, this model emphasises the networked nature of influence and interaction across personal, social, and structural systems..

(RESEARCHER): Review Neal and Neal (2021) on networked systems. Adapt the final model of themes to reflect both nested and networked relationships using an ecological framework. Use examples and visual concepts to demonstrate how each theme intersects with multiple layers of influence.

(AI) Below is an integrative perspective that merges your “inside-out” thematic model with the networked approach advocated by Neal and Neal (2021). While you retain the notion that certain elements (e.g., personal emotional growth) reside more at the “center,” a networked viewpoint highlights how each theme overlaps and intersects—rather than being strictly nested—across multiple ecological layers. Adapting your thematic framework to EST can offer a more holistic picture of how the themes operate simultaneously at different levels of a person’s ecological context.

Mapping the Five Themes onto an Ecological Lens

Theme 2 (Center): Balancing Self-Care, Vulnerability, and Emotional Growth

- Microsystem Influence:
  - The person’s immediate inner world—emotional health, self-care habits, vulnerability—interacts with close interpersonal relationships (e.g., family, best friends).
  - *Example*: Someone who regularly practices self-reflection (Theme 2) may improve relationships in the microsystem because they become more empathetic and emotionally available.

Theme 1: Cultivating Self-Worth and Inner Strength

- Microsystem ↔ Mesosystem:
  - As individuals build self-worth, this inner change shapes how they engage across multiple immediate contexts—home, school, or work.
  - *Example*: Feeling worthy (Theme 1) can improve confidence at school (microsystem) and spark better synergy between home and school environments (mesosystem).

Theme 5: Fostering Hope and Positive Outlook

- Mesosystem ↔ Exosystem:
  - A hopeful individual not only bridges personal environments (mesosystem) but can also adapt to policies and community-level factors (exosystem).
  - *Example*: If local community programs (exosystem) offer support for climate activism, an optimistic outlook (Theme 5) makes an individual more likely to engage or seek opportunities for involvement.

Theme 3: Personal Agency and Action

- Exosystem → Macrosystem (bidirectionally):
  - Individual agency can scale up from personal decision-making to influence larger policies and cultural dialogue.
  - *Example*: A person who develops strong agency in their household (microsystem) may join broader activist movements or volunteer organizations that affect societal-level norms (macrosystem). Conversely, cultural emphasis on individual freedom or collective action can shape how personal agency is expressed.

Theme 4: Connecting and Building Community

- Mesosystem ↔ Exosystem and Macrosystem):
  - Community-building spans relationships across multiple microsystems (church, workplace, social clubs) and often interacts with local institutions or social norms (exosystem/macrosystem).
  - *Example*: A youth climate group fosters connections among peers (mesosystem) and may be shaped by wider community structures, like local government or cultural attitudes (exosystem/macrosystem).

## **Diagram of Third Theme Order**

Here is a text-based schematic suggesting how each theme intersects multiple ecological layers. Notice that the individual is at the center, with each theme reaching into progressively broader contexts. This visual emphasizes how themes intersect dynamically across layers. Arrows suggest directional influence, while nested positioning reflects contextual reach.

[ MACROSYSTEM ] <---- Theme 3: Large-scale agency & activism

^

^ (family, friends, immediate settings)

| but also cross into meso-level

|

INDIVIDUAL <---- core psychological processes

|(emotional states, self-concept,

| sense of hope, impetus for action) | (cultural norms, global climate issues)

|

[ EXOSYSTEM ] <---- Theme 4 can extend here (community resources, local gov)

^

| (community-level policies, organizations)

|

[ MESOSYSTEM ] <---- Intersection of personal contexts:

^ home-school-work relationships

|

|--- Theme 2 (emotional self-care) influences

| how you interact across these settings

|

[ MICROSYSTEM ] <---- Theme 1 & 5 strongly reside here

Theme 2 (Balancing Self-Care, Vulnerability, and Emotional Growth) mostly revolves around internal states but also affects close relationships (microsystem) and beyond.

Theme 1 (Cultivating Self-Worth) and Theme 5 (Hope/Positivity) lie within the individual’s immediate perceptions but readily extend into their home, school, or work (microsystem → mesosystem).

Theme 3 (Personal Agency and Action) can become exosystem where individuals’ actions potentially influence and are influenced by broader societal or global forces.

Theme 4 (Connecting and Building Community) often manifests in the mesosystem (relationships between different microsystems) and can expand into exo and macrosystem settings (community programs, social networks).

The following schematic (Figure 4) illustrates how the five themes interact across ecological levels, combining nested and networked relationships as conceptualized in Bronfenbrenner’s theory and further developed by Neal and Neal (2021).


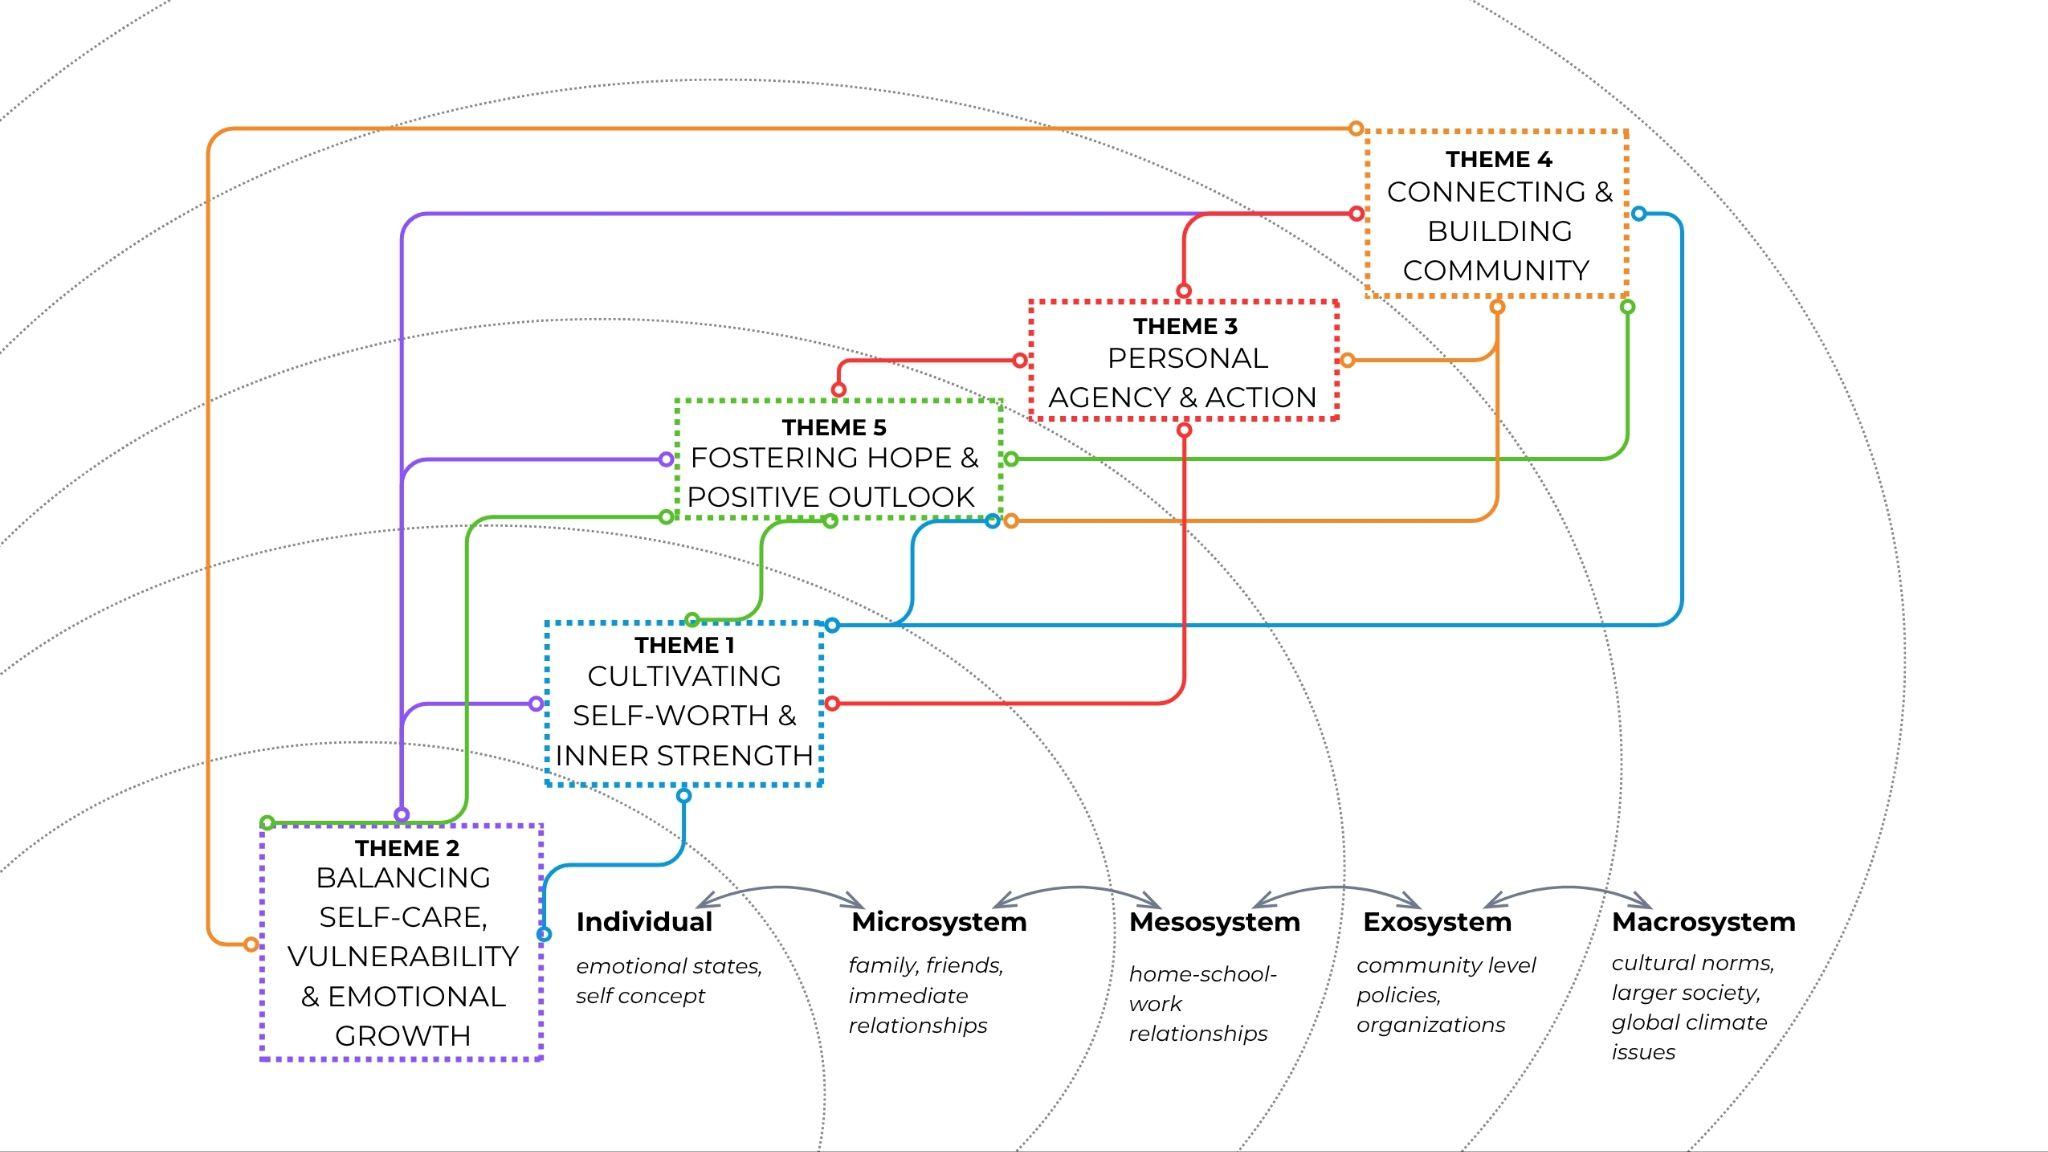


**Figure 4**: Networked Ecological Model of Interconnected Themes based on Bronfenbrenner’s theory and Neal and Neal, (2021).

## **Interpretive Evolution of Theme Structure Across Models**

In the first attempt, the AI created a linear hierarchy building from the internal (Theme 1) to the relational (Theme 2), to outward expression (Theme 3), inward emotional management (Theme 4), and the overarching emotional lens for the future (Theme 5). However, this structure did not prioritize the emotional development of the participants.

In the next iteration, the AI was directed to consider a center-outward logic. It was asked to reflect how personal emotional work, such as embracing one’s feelings, setting boundaries, accepting mistakes, and exercising vulnerability, could serve as the foundation for other areas of growth and change. From this emotional core, participants extend into additional dimensions of empowerment, connection, action, and hope.

In this conceptualization, the themes were arranged in concentric circles, moving from the innermost ring (Theme 2: Balancing Self-Care, Vulnerability, and Emotional Growth) to the outermost ring (Theme 4: Connecting and Building Community). The thematic structure resulting from this inside-out arrangement is illustrated in **Figure 2.** Linear model of theme progression.

This model more accurately reflected the intervention’s core design, but the structure remained unidirectional and did not capture the complexity of how themes influence one another dynamically. To address this limitation, the AI was prompted to consider Bronfenbrenner’s Ecological Systems Theory (EST) (Bronfenbrenner, 1979), which highlights nested, interdependent layers of influence that shape and are shaped by the individual. This framework is depicted in **Figure 3.** Nested model of emotional growth.

While the concentric model supported EST’s classic visual metaphor of nested systems, it may have oversimplified the interactive dynamics among the themes (Neal and Neal, 2021). To explore this complexity, the AI was asked to revise the inside-out progression into a networked model. In this final structure, themes are conceptualized as intersecting across multiple ecological layers, with the individual at the center of a web of connections. This networked perspective is illustrated in Figure 4.
