# Supplementary material for: A Climate of Emotions pilot study reducing climate anxiety and strengthening resilience
Source: Research Square preprint supplement (doi:10.21203/rs.3.rs-8349463/v1), 2026-01-23
Supplement: Supplementary file 5 [file 96a88278cf9d105ae4828a9c.docx]

**Supplementary File 1: Climate of Emotions Intervention Protocol**

This supplementary file provides a detailed description of the Climate of Emotions (COE) intervention developed by Six Seconds and used in the current study. The intervention was designed to support youth and intergenerational participants in processing climate-related emotions, building emotional intelligence competencies, and fostering resilience. The protocol outlines a three-phase structure:

- Grieving in Connection: Acknowledging climate distress and sharing emotional intelligence skills in a supportive environment.
- Radical Re-imagining: Encouraging creative, imaginative, future-oriented thinking rooted in values and shared purpose.
- Regenerative Planning: Supporting participants to develop emotionally intelligent resilience strategies for sustainable action.

Each phase is described in more detail below. These stages were created to guide participants through emotional reflection, collaborative visioning, and purpose-driven planning. This information is included to enhance transparency and support future replication or adaptation.

1: Grieving in Connection*:* Participants acknowledged their current emotions. This first phase aimed to use storytelling to share emotions and personal identities while building connections between participants.

Participants acknowledged their current emotions. This first phase aimed to use storytelling to share emotions and personal identities while building connections among participants. Participants exchanged short stories with a partner in response to one of the following prompts:

- “Share a story about how climate has impacted your life and shaped your identity. Reflect on a specific experience or moment where you felt the effects of environmental changes deeply. Consider how this experience has influenced your values, beliefs, or actions.”
- “Tell a story about a place in nature that holds deep meaning for you. How has this place influenced your relationship with the environment? Reflect on a moment when you felt a strong connection to this place, and consider how this connection has shaped your views on environmental stewardship and conservation.”

The storytelling activity followed a “story exchange” process (Narrative 4, 2025):

Preparing – Facilitators organized participants into groupings, identifying goals, and establishing trust.

Sharing – Participants shared their stories with a partner who actively listened.

Retelling – The group came together and each participant retold their partner’s story in the first person.

Reflecting – Participants discussed how they felt and what they learned from sharing stories.

2: Radical Re-imagining: Participants shared their perspectives in a creative arts session. This second phase aimed to expand thinking using imagination and self-expression through a co-creation session. In this instance, the creative arts session entailed participants making body-percussion music in whole and small groups to communicate different emotions. The act of creating and performing together brought participants into a generative state of mind where new ideas and collaborations became possible.

3: Regenerative Planning: Participants developed resilience skills by identifying areas of strengths that could be activated for support. This final phase focused on transitioning from vision to goal setting. Participants participated in a guided visualization using optimism to generate feelings of sustainability, identify strengths, review their options, and then in pairs shared, reflected, and considered future actions to implement for their next steps. The participants wrote short reflective statements about their strengths and actions on cards and then the whole group assembled an interlocking “resilience tower” made from the cards.

This visioning activity followed a four-step process, adapted from design thinking models (Tschimmel, 2012):

1. Review: Brief recap of the program thus far, including explanation of the three phases and goal of this third phase.

2. Grounding practic**e**: 1 minute guided visualisation with breathing exercises to refocus and prepare.

3. Silent Reflection and Group Discussion**:** Participants are invited to consider what they’ve learned in the program thus far, and how it would feel to step forward informed by this learning. They are encouraged to consider their goals, and, rather than focusing on the external aspects (such as “reduce global warming,”), to identify internal goals where they have direct control (such as: “be more consistent in my advocacy”). They are invited to share their answers in small groups facilitated by a youth leader.

4. Action: Participants are invited to summarize their discussions into a single phrase written on a card with the prompt, “What will support you to increase the sustainability of your work on sustainability?” They discuss the “resilience tool” phrases they’ve written with a partner, and then place their cards in a collective “resilience tower.” They are encouraged to read one another’s cards and discuss what they observe.
