# Supplementary material for: A Climate of Emotions pilot study reducing climate anxiety and strengthening resilience
Source: Research Square preprint supplement (doi:10.21203/rs.3.rs-8349463/v1), 2026-01-23
Supplement: Supplementary file 6 [file ec01e49d0e0b204279609cb0.docx]

## **Appendix B. Reflective Prompts Used to Elicit Short Statements**

“What will support you to increase the sustainability of your work on sustainability?”

“Which of these support-related feelings could you give yourself?”
