# Supplementary material for: A Climate of Emotions pilot study reducing climate anxiety and strengthening resilience
Source: Research Square preprint supplement (doi:10.21203/rs.3.rs-8349463/v1), 2026-01-23
Supplement: Supplementary file 7 [file f8800d8ea3385e155d3942e4.docx]

## **Appendix C. R-Code used for Analyses**

MANOVA

coe_manova_model <- manova(cbind(CE_post, CI_post, CA_post, CP_post) ~ CE_pre + CI_pre + CA_pre + CP_pre,data = coe_cleaned_long_final_wide_manova)

summary(coe_manova_model, test = "Wilks")

summary.aov(coe_manova_model)

Linear Mixed Effects Models

Anxiety

mixed_model_anxiety <- lme(Score ~ Intervention, random = ~1 | ID, data = climate_anxiety_pre_post_long_MEM)

summary(mixed_model_anxiety)

cohen_d_anxiety <- cohen.d(climate_anxiety_pre_post_long_MEM$Score[climate_anxiety_pre_post_long_MEM$Intervention == 1], climate_anxiety_pre_post_long_MEM$Score[climate_anxiety_pre_post_long_MEM$Intervention == 0], paired = TRUE)

print(cohen_d_anxiety)

Enthusiasm

mixed_model_enthusiasm <- lme(Score ~ Intervention, random = ~1 | ID, data = climate_enthusiasm_pre_post_long_MEM)

summary(mixed_model_enthusiasm)

Isolation

mixed_model_isolation <- lme(Score ~ Intervention, random = ~1 | ID, data = climate_isolation_pre_post_long_MEM)

summary(mixed_model_isolation)

Powerlessness

mixed_model_powerlessness <- lme(Score ~ Intervention, random = ~1 | ID, data = climate_powerlessness_pre_post_long_MEM)

summary(mixed_model_powerlessness)

Random Intercept Model vs Random Intercept and Random Slope Model

Anxiety

mixed_model_anxiety_model_1 <- lme(Score ~ Intervention, random = ~1 | ID, data = climate_anxiety_pre_post_long_MEM)

mixed_model_anxiety_model_2 <- lme(Score ~ Intervention, random = ~Intervention | ID, data = climate_anxiety_pre_post_long_MEM)

anova(mixed_model_anxiety_model_1, mixed_model_anxiety_model_2)

Enthusiasm

mixed_model_enthusiasm_model_1 <- lme(Score ~ Intervention, random = ~1 | ID, data = climate_enthusiasm_pre_post_long_MEM)

mixed_model_enthusiasm_model_2 <- lme(Score ~ Intervention, random = ~Intervention | ID, data = climate_enthusiasm_pre_post_long_MEM)

anova(mixed_model_enthusiasm_model_1, mixed_model_enthusiasm_model_2)

Isolation

mixed_model_isolation_model_1 <- lme(Score ~ Intervention, random = ~1 | ID, data = climate_isolation_pre_post_long_MEM)

mixed_model_isolation_model_2 <- lme(Score ~ Intervention, random = ~Intervention | ID, data = climate_isolation_pre_post_long_MEM)

anova(mixed_model_isolation_model_1, mixed_model_isolation_model_2)

Powerlessness

mixed_model_powerlessness_model_1 <- lme(Score ~ Intervention, random = ~1 | ID, data = climate_powerlessness_pre_post_long_MEM)

mixed_model_powerlessness_model_2 <- lme(Score ~ Intervention, random = ~Intervention | ID, data = climate_powerlessness_pre_post_long_MEM)

anova(mixed_model_powerlessness_model_1, mixed_model_powerlessness_model_2)
